# Supplementary material
Source: PubMed Central journal article supplement (PMC8270768)
Supplement: 134_2021_6474_MOESM1_ESM.pdf [file 134_2021_6474_MOESM1_ESM.pdf]

**SAPS-3 Performance for Hospital Mortality Prediction in 30,571 Patients  
With COVID-19 Admitted to ICUs in Brazil**

**Electronic Supplementary Material**

Kurtz et al.

## **Supplemental Methods**

### *Data source and study population*

We included all adult patients (>16 y.o.) with RT-PCR-confirmed SARS-CoV-2 infection admitted to 188 ICUs of 45 hospitals (*Rede D'Or São Luiz*) from February 26<sup>th</sup>, 2020, to April 30<sup>th</sup>, 2021. Local and National Ethics Committee (CAAE: 17079119.7.0000.5249) approved the study without the need for informed consent. Anonymized information was obtained from an electronic system, which contains prospectively collected structured data for all ICU admissions (Epimed Monitor<sup>®</sup>, Rio de Janeiro, Brazil). We used descriptive analysis to report baseline and outcome data as appropriate.

### *Statistical Analysis*

We estimated SAPS-3 mortality probabilities using the SAPS-3 standard equation (SAPS3-SE). In addition, we obtained recalibrated probabilities for COVID-19 patients after performing a first-level customization of the SAPS-3 equation, using a logistic regression model with hospital mortality as the dependent variable and SAPS-3 score's predicted probabilities from the SAPS-3-SE as the sole predictor.

We assessed the discrimination for hospital mortality using the area under the receiver operating curve (AUROC) and Brier's Score. Calibration was evaluated using the Hosmer-Lemeshow goodness-of-fit (GOF) test and the calibration belt method[5]. We estimated 95% confidence intervals (95%CI) using 2,000 resamples.

R 4.1 was used for all analyses.

**Supplementary Table 1 – Characteristics of COVID-19 ICU admissions**

| Characteristic                                                 | N = 30,571        |
|----------------------------------------------------------------|-------------------|
| Age, median (IQR)                                              | 55 (42, 69)       |
| 16-39, N (%)                                                   | 5,935 (19%)       |
| 40-49                                                          | 6,267 (20%)       |
| 50-59                                                          | 6,077 (20%)       |
| 60-69                                                          | 5,058 (17%)       |
| 70-79                                                          | 3,827 (13%)       |
| >=80                                                           | 3,407 (11%)       |
| Female, N (%)                                                  | 12,301 (40.3%)    |
| Modified Frailty Index (MFI), median (IQR)                     | 1.00 (0.00, 2.00) |
| Non-frail (MFI = 0)                                            | 13,400 (44%)      |
| Pre-frail (MFI = 1-2)                                          | 13,429 (44%)      |
| Frail (MFI >= 3)                                               | 3,742 (12%)       |
| Charlson Comorbidity Index, median (IQR) [n = 30,244]          | 0.00 (0.00, 1.00) |
| Any comorbidities, N (%)                                       | 20,890 (68%)      |
| Hypertension                                                   | 13,167 (43%)      |
| Diabetes                                                       | 7,368 (24%)       |
| Cardiovascular disease                                         | 3,667 (12%)       |
| Imunosuppression                                               | 4,117 (13%)       |
| Obesity                                                        | 2,882 (9.4%)      |
| COPD or Asthma                                                 | 2,209 (7.2%)      |
| Cerebrovascular disease                                        | 1,725 (5.6%)      |
| Malignancy                                                     | 1,707 (5.6%)      |
| Chronic kidney disease                                         | 1,282 (4.2%)      |
| Tobacco                                                        | 894 (2.9%)        |
| Liver Cirrhosis                                                | 157 (0.5%)        |
| Other comorbidities                                            | 6,138 (20%)       |
| SOFA score, median (IQR)                                       | 1 (0, 4)          |
| SAPS-3, median (IQR)                                           | 43 (39, 51)       |
| Initial respiratory support (First 24h)                        |                   |
| Oxygen                                                         | 17,868 (58%)      |
| NIRS first                                                     | 9,383 (31%)       |
| IMV first                                                      | 3,320 (11%)       |
| PaO <sub>2</sub> /FiO <sub>2</sub> , median (IQR) [n = 10,800] | 200 (98, 317)     |
| Normal (> 300)                                                 | 2,960 (27%)       |
| Mild (201–300)                                                 | 2,405 (22%)       |
| Moderate (101–200)                                             | 2,639 (24%)       |
| Severe (≤ 100)                                                 | 2,796 (26%)       |
| In-hospital mortality, N (%)                                   | 4,581 (15%)       |
| SAPS-3 predicted probability, median (IQR)                     | 0.09 (0.06, 0.19) |
| SAPS-3 recalibrated probabilities, median (IQR)                | 0.08 (0.05, 0.18) |

IQR: Interquartile range (1<sup>st</sup> quartile – 3<sup>rd</sup> quartile); COPD: Chronic obstructive pulmonary disease; NIRS: Noninvasive respiratory support; IMV – invasive respiratory support; SOFA: Sequential Organ Failure Assessment; SAPS-3: Simplified acute physiology score 3

**Supplementary Table 2 – Goodness-of-fit, calibration and discrimination of SAPS-3 models**

**Hosmer-Lemeshow test**

| Model                    | C statistic       | H statistic       |
|--------------------------|-------------------|-------------------|
| SAPS-3 standard equation | 172.8 (p < 0.001) | 259.4 (p < 0.001) |
| SAPS-3 recalibrated      | 127.4 (p < 0.001) | 245.1 (p < 0.001) |

**SAPS-3 discrimination and calibration**

| Model                    | AUROC            | Brier's Score      |
|--------------------------|------------------|--------------------|
| SAPS-3 standard equation | 0.83 (0.82-0.84) | 0.097 (0.095-0.01) |
| SAPS-3 recalibrated      | 0.83 (0.82-0.84) | 0.097 (0.095-0.01) |

95% CI – Bootstrap (2000 resamples)

AUROC – Area Under the Receiving Operating Characteristics (ROC) curve

**Supplementary Figure 1** - Calibration belts for SAPS-3 predicted probabilities (standard equation and COVID-19 customized equation) stratifying patients in three consecutive periods.

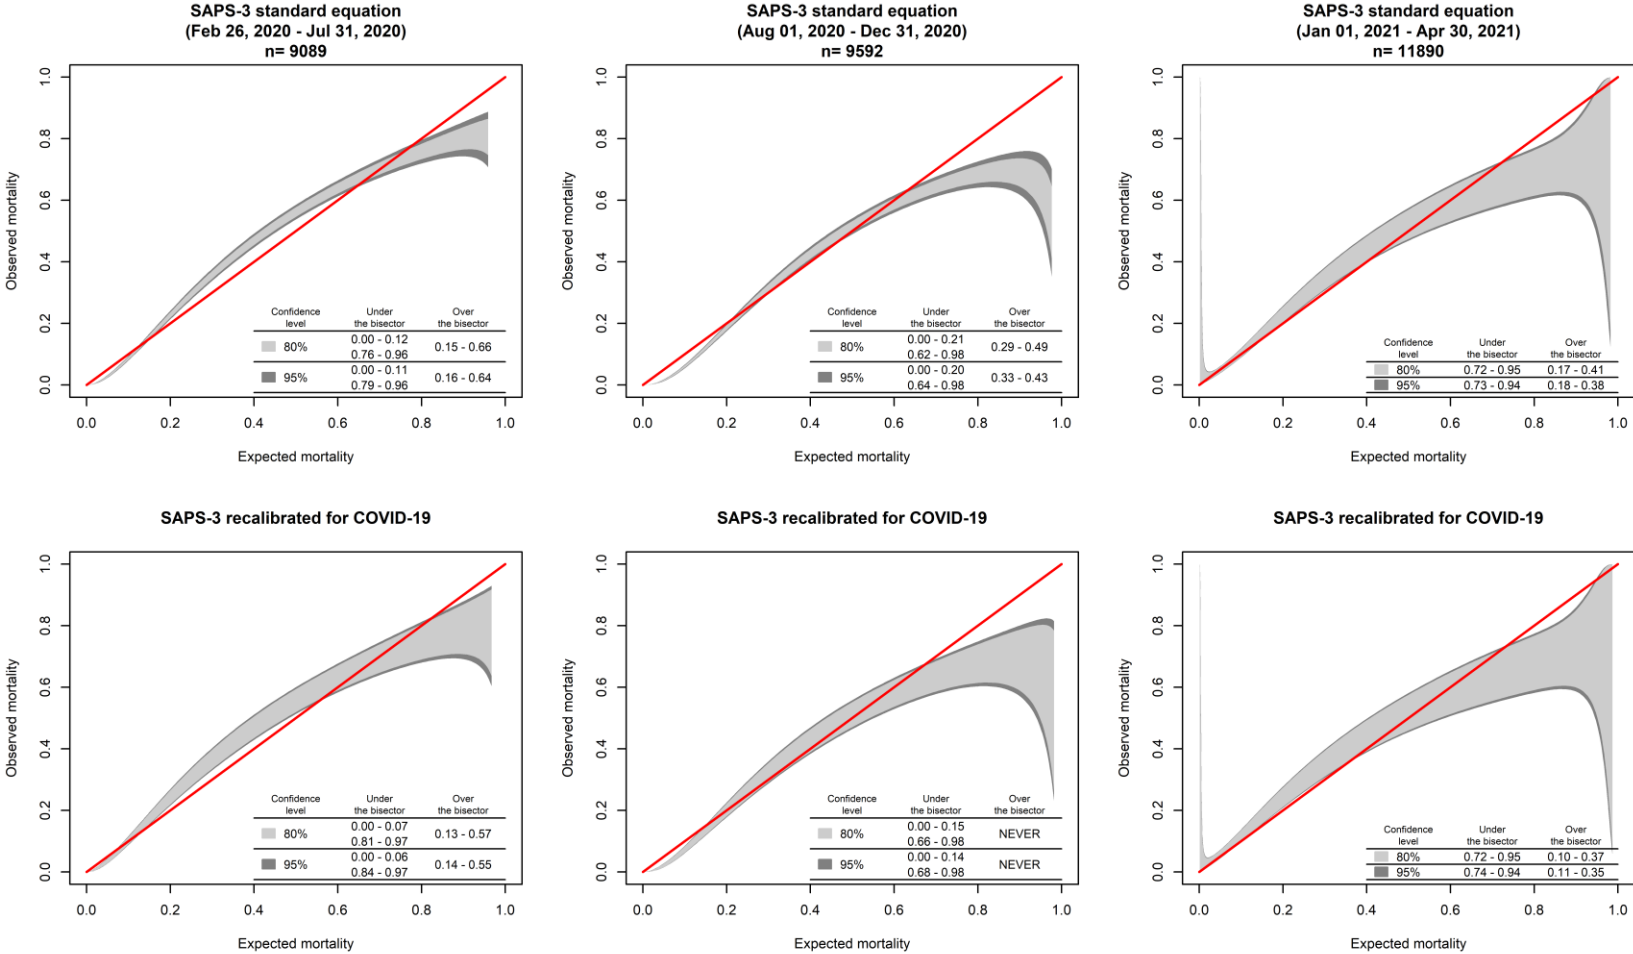

**Supplementary Table 3** – Goodness-of-fit, calibration and discrimination of SAPS-3 models stratifying patients in three consecutive periods.

| <b>Metrics</b>                        | <b>Feb 26, 2020 –<br/>July 31, 2020<br/>[n = 9,089]</b> | <b>Aug 01, 2020 –<br/>Dec 31, 2020<br/>[n = 9,592]</b> | <b>Jan 01, 2021 –<br/>Apr 30, 2021<br/>[n = 11,890]</b> |
|---------------------------------------|---------------------------------------------------------|--------------------------------------------------------|---------------------------------------------------------|
| <b>SAPS-3, median [IQR]</b>           | 42 [37, 52]                                             | 42 [39, 50]                                            | 43 [39, 51]                                             |
| <b>Standard equation (95% CI)</b>     |                                                         |                                                        |                                                         |
| SMR                                   | 0.99 (0.95-1.03)                                        | 0.81 (0.77-0.85)                                       | 1.04 (1.002-1.08)                                       |
| AUROC                                 | 0.86 (0.85-0.87)                                        | 0.86 (0.85-0.87)                                       | 0.79 (0.78-0.81)                                        |
| Brier`s Score                         | 0.095 (0.091-0.099)                                     | 0.081 (0.078-0.085)                                    | 0.111 (0.107-0.116)                                     |
| H-L test                              | C = 95, p<0.001<br>H = 100.1, p<0.001                   | C = 163.9, p<0.001<br>H = 214.2, p<0.001               | C = 27.7, p<0.001<br>H = 80.5, p<0.001                  |
| <b>COVID-19 Recalibrated (95% CI)</b> |                                                         |                                                        |                                                         |
| SMR                                   | 1.03 (0.99-1.08)                                        | 0.85 (0.81-0.89)                                       | 1.08 (1.05-1.12)                                        |
| AUROC                                 | 0.86 (0.85-0.871)                                       | 0.86 (0.85-0.87)                                       | 0.79 (0.78-0.81)                                        |
| Brier`s Score                         | 0.095 (0.091-0.10)                                      | 0.081 (0.077-0.085)                                    | 0.112 (0.108-0.116)                                     |
| H-L test                              | C = 80, p<0.001<br>H = 85, p<0.001                      | C = 119.2, p<0.001<br>H = 189.9, p<0.001               | C = 56.6, p<0.001<br>H = 119.1, p<0.001                 |

H-L: Hosmer-Lemeshow; SMR: Standardized Mortality Ratio; AUROC: Area Under the Receiving Operating Characteristic curve

95% CI: 95% confidence interval (2,000 resamples)

**Supplementary Table 4** – Comparisons of findings from studies assessing severity scores in patients with COVID-19

|                               | Study cohort              |                                                              |                                                                |                                                                                                                                                                                                                                      |                                                                                                                                                                                                                                      |
|-------------------------------|---------------------------|--------------------------------------------------------------|----------------------------------------------------------------|--------------------------------------------------------------------------------------------------------------------------------------------------------------------------------------------------------------------------------------|--------------------------------------------------------------------------------------------------------------------------------------------------------------------------------------------------------------------------------------|
| Authors                       | Zou et al. [4]            | Stephens et al. [1]                                          | Higgins et al. [2]                                             | Metnitz et al. [3]                                                                                                                                                                                                                   | Kurtz et al.                                                                                                                                                                                                                         |
| Year published                | 2020                      | 2020                                                         | 2021                                                           | 2021                                                                                                                                                                                                                                 | 2021                                                                                                                                                                                                                                 |
| ICUs (n)                      | 01                        | 03                                                           | 285                                                            | 90                                                                                                                                                                                                                                   | 188                                                                                                                                                                                                                                  |
| Country                       | China                     | United Kingdom                                               | United States                                                  | Austria                                                                                                                                                                                                                              | Brazil                                                                                                                                                                                                                               |
| Data collection period        | Jan 10, 2020-Feb 10, 2020 | Mar 10, 2020-May 22, 2020                                    | Mar 14, 2020-June 17, 2020                                     | Jan 01, 2020-Jan 31, 2021                                                                                                                                                                                                            | Feb 26, 2020-April 30, 2021                                                                                                                                                                                                          |
| Patients (n)                  | 154                       | 242                                                          | 1,491                                                          | 1,464                                                                                                                                                                                                                                | 30,571                                                                                                                                                                                                                               |
| Age (years, mean or median)   | 60.7                      | 59                                                           | 63.4                                                           | 67.0                                                                                                                                                                                                                                 | 55                                                                                                                                                                                                                                   |
| Male (%)                      | 43.5%                     | 71.9%                                                        | 58.7%                                                          | 70.0%                                                                                                                                                                                                                                | 59.7%                                                                                                                                                                                                                                |
| Score(s) evaluated            | APACHE II                 | APACHE II, SAPS II and ICNARC                                | APACHE IV                                                      | SAPS 3                                                                                                                                                                                                                               | SAPS 3                                                                                                                                                                                                                               |
| Predicted hospital mortality  | Not reported              | 23.5% (APACHE II)<br>9.7% (SAPS II)<br>ICNARC (not reported) | 16.0%                                                          | Not reported                                                                                                                                                                                                                         | 15.7%                                                                                                                                                                                                                                |
| Observed hospital mortality   | 33.8%                     | 37.6%                                                        | 24.3%                                                          | 34.2%                                                                                                                                                                                                                                | 15%                                                                                                                                                                                                                                  |
| Discrimination: AUROC (95%CI) | 0.966<br>(0.942-0.990)    | Not reported                                                 | Not reported                                                   | 0.74<br>(0.72-0.77)                                                                                                                                                                                                                  | 0.83<br>(0.82-0.84)                                                                                                                                                                                                                  |
| Calibration assessment        | Not reported              | Not reported                                                 | Graphic representation only.<br>No specific text was used.     | Hosmer-Lemeshow GOF test*;<br>Calibration belt                                                                                                                                                                                       | Hosmer-Lemeshow GOF test*;<br>Calibration belt                                                                                                                                                                                       |
| Calibration interpretation    | Not reported              | Not reported                                                 | APACHE IV underestimated mortality in all studied risk groups. | Standard equation had poor calibration (GOF: $P<0.001$ ) with underestimation of mortality in low and intermediate risk groups. Customized equation led to improvements in calibration (GOF=0.89)* with good fit in all risk groups. | Standard equation had poor calibration (GOF: $P<0.001$ ) with underestimation of mortality in low and intermediate risk groups and overestimation of high-risk groups. Customized equation did not improve calibration ( $P<0.001$ ) |

|                       |              |              |                  |                                                                           |                                                                               |
|-----------------------|--------------|--------------|------------------|---------------------------------------------------------------------------|-------------------------------------------------------------------------------|
| Hospital SMR (95% CI) | Not reported | Not reported | 1.52 (1.35-1.68) | Standard equation, 1.20 (1.12–1.27);<br>customized equation, not reported | Standard equation, 0.95 (0.93-0.98); customized equation,<br>1.00 (0.97-1.02) |
|-----------------------|--------------|--------------|------------------|---------------------------------------------------------------------------|-------------------------------------------------------------------------------|

ICU: intensive care unit; AUROC: area under the receiver operating characteristic curve; SMR: standardized mortality rate; CI: confidence interval

\*Only C-statistics reported; GOF: goodness of fit
